# Supplementary material
Source: PubMed Central journal article supplement (PMC8342563)

Supplemental Figure for:  
Safety and Efficacy of First-Line Pembrolizumab in Black Patients with Metastatic Non-Small-Cell Lung Cancer  
Monica Peravali et al.

Figure S1. Progression-free survival and overall survival across different institutions.

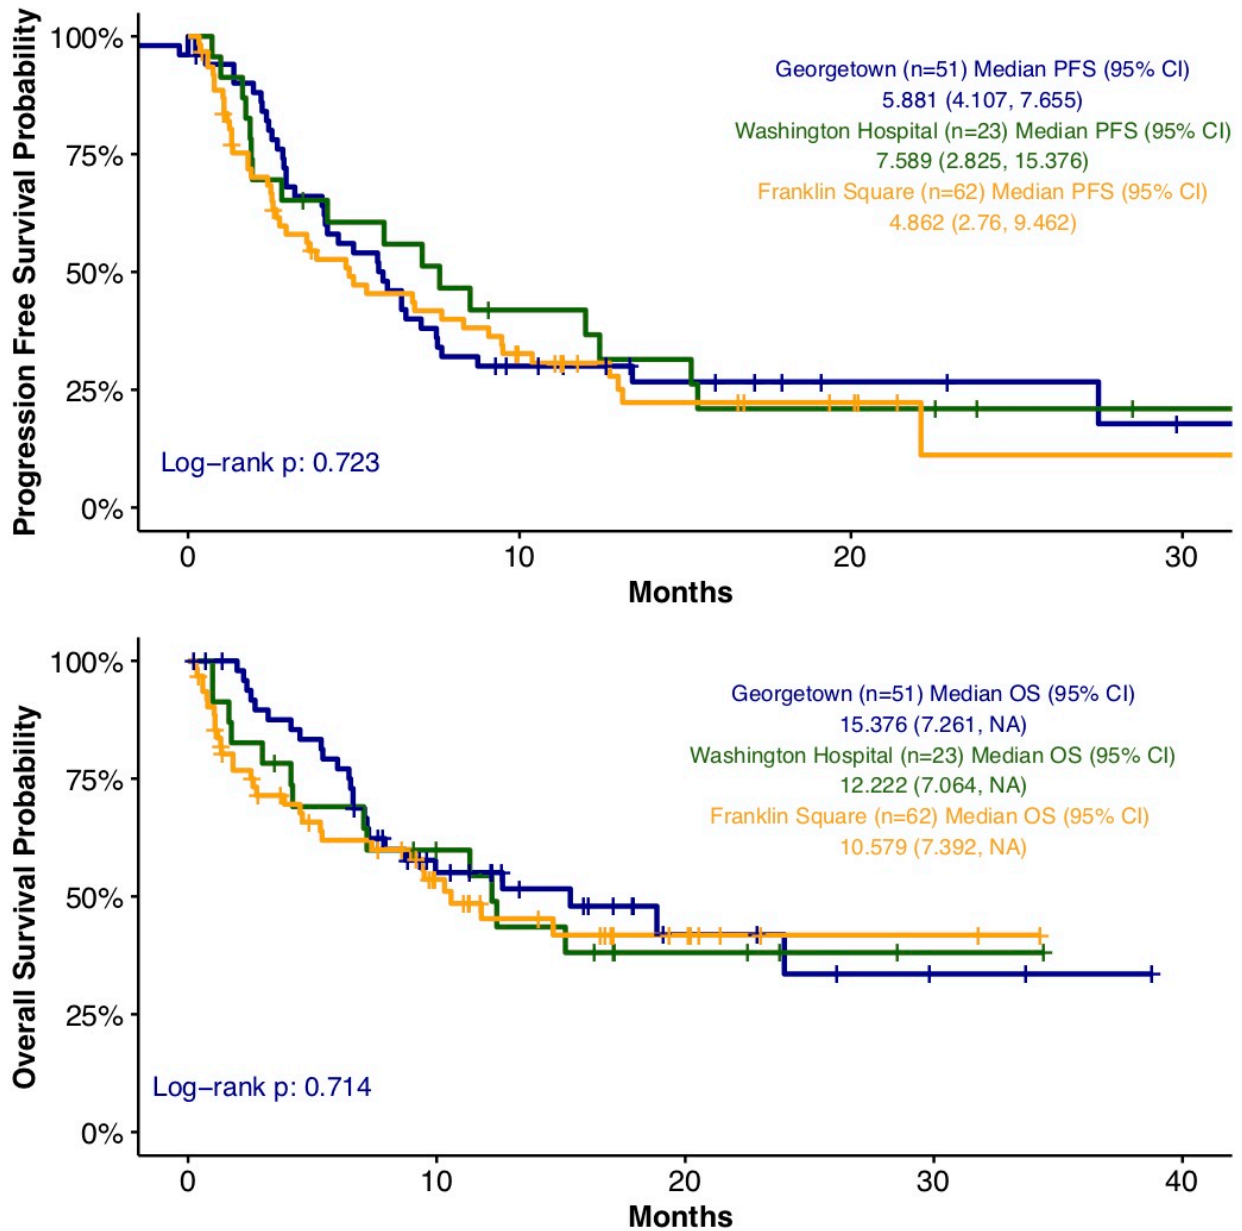

Supplement: ONCO-26-694-s001.pdf [file ONCO-26-694-s001.pdf]
